# Supplementary material
Source: PubMed Central journal article supplement (PMC6549025)
Supplement: EMBR-20-e47202-s001.pdf [file EMBR-20-e47202-s001.pdf]

1 **The Appendix**

2 Appendix Figure S1 Page 2-4

3 Appendix Figure S2 Page 5-6

4 Appendix Figure S3 Page 7-8

5 Appendix Figure S4 Page 9-10

6 Appendix Figure S5 Page 11-12

7 Appendix Figure S6 Page 13

8 Appendix Figure S7 Page 14

9 Appendix Figure S8 Page 15

10

11

12 Appendix Table S1 Page 16

13 Appendix Table S2 Page 17-21

14 Appendix Table S3 Page 22-27

15 Appendix Table S4 Page 28

16

17

18

19

20

21

22

23 Appendix Figure S1

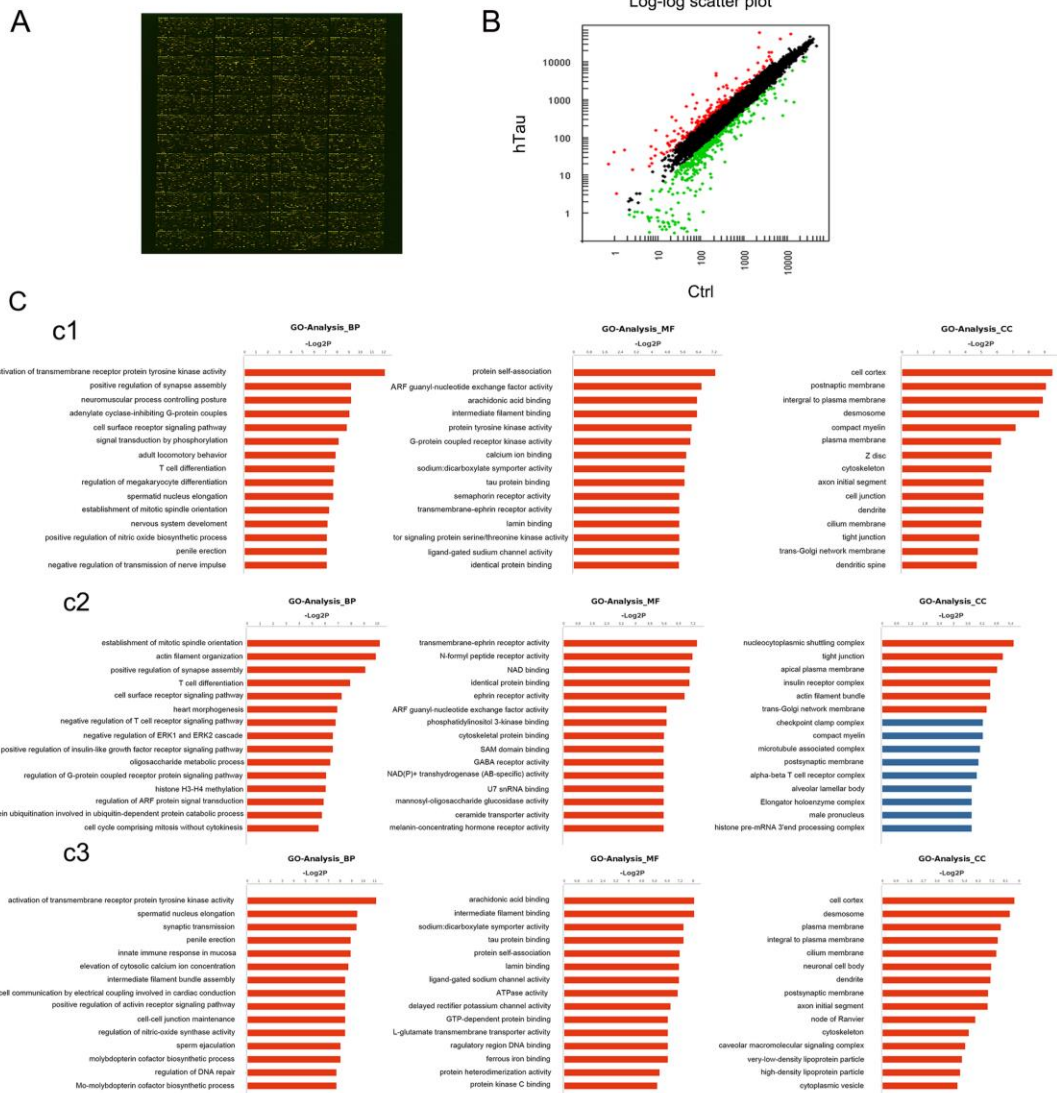

D

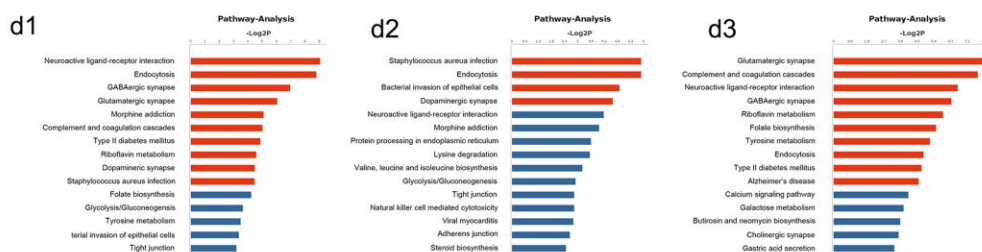

E

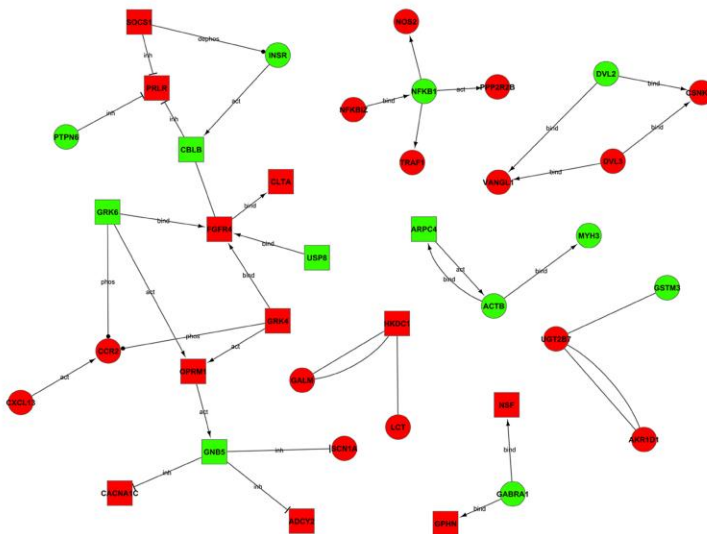

25

26 **Appendix Figure S1 Tau accumulation changes mRNA levels.**

27 HEK293 cells were transfected with wildtype full-length human tau plasmid (hTau) or its  
 28 empty vector (Ctrl) for 48 h, and then the mRNA was extracted and the gene expression  
 29 was detected by the Jingxin® 35K oligo gene array (CapitalBio Inc., Beijing, China). (A)  
 30 Heatmap presentation of hTau-induced gene expression. (B) Scatter plots show variations  
 31 in mRNA expression in hTau and the control cells: ‘Red’ indicates high relative  
 32 expression and ‘Blue’ indicates low relative expression. (C) Gene ontology-(GO)  
 33 analysis, (c1) up-regulated genes GO-analysis, (c2) down-regulated genes GO-analysis,  
 34 (c3) up- & down-regulated genes GO-analysis, BF (Biological Processes), MF  
 35 (Molecular Function), CC (Cellular Component). ‘Red’ or ‘Blue’ indicates significant or

36 non-significant GO Term. (D) Pathway Analysis, (d1) up-regulated genes Pathway  
37 Analysis, (d2) down-regulated genes Pathway Analysis, (d3) up- & down-regulated genes  
38 Pathway Analysis. 'Red' or 'Blue' indicates significant or non-significant Pathway Term.  
39 (E) Network model analysis, 'Red' or 'Blue' indicates high or low relative expression.

40

41

42

43

44

45

46

47

48

49

50

51

52

53

54

55

A

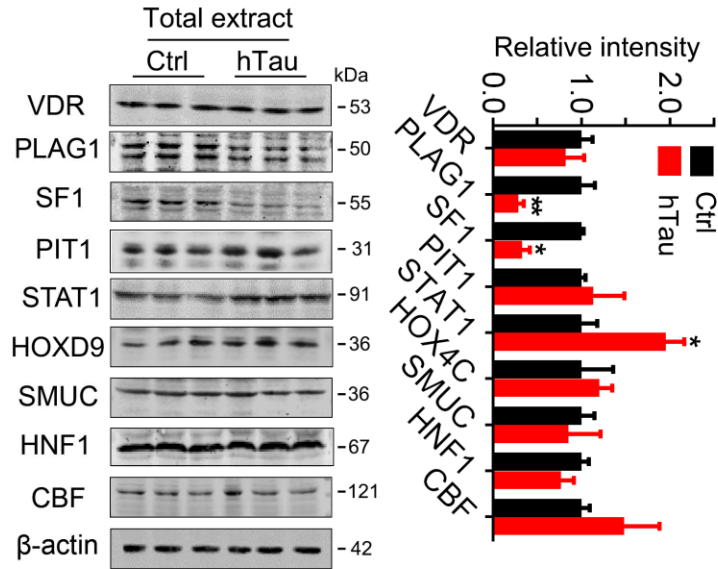

B

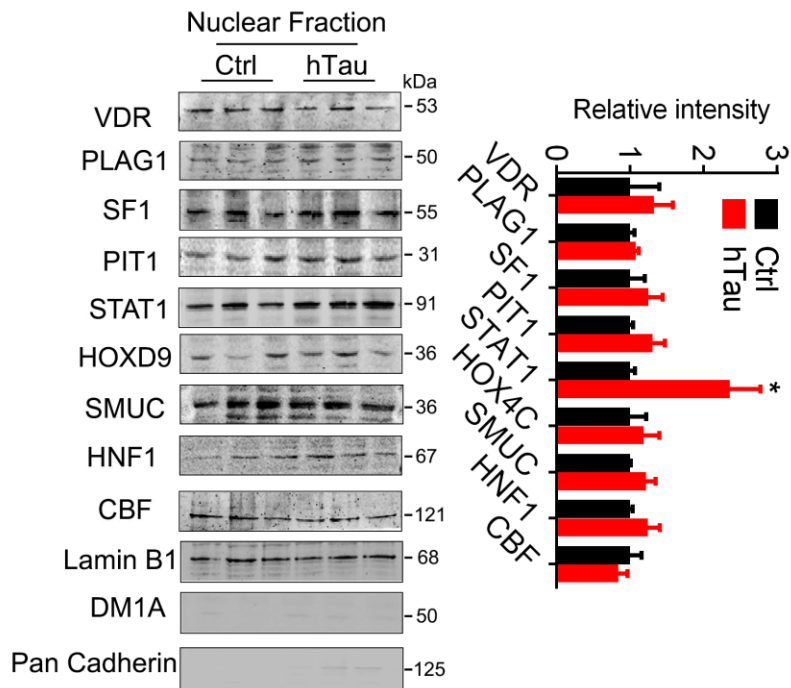

58 **Appendix Figure S2 Overexpression of hTau increases protein level of STAT1 in**  
59 **HEK293 cells.**

60 (A, B) The human tau plasmid (hTau) or its empty vector (Ctrl) was transfected in  
61 HEK293 cells for 48 h. Then the protein levels of the transcription factors (TFs) in total  
62 extracts and the nuclear fraction, screened out from Fig. 1A by using TF Activation  
63 Profiling Plate Array II, were measured by Western blotting and quantitative analysis.  
64 Find the full name of transcription factors in Table S2.

65 **Data information:** \*,  $p < 0.05$ , \*\*,  $p < 0.01$  vs Ctrl. Data were presented as mean  $\pm$  SD (n=4,  
66 **Mann-Whitney test**).

67

68

69

70 **Appendix Figure S3**

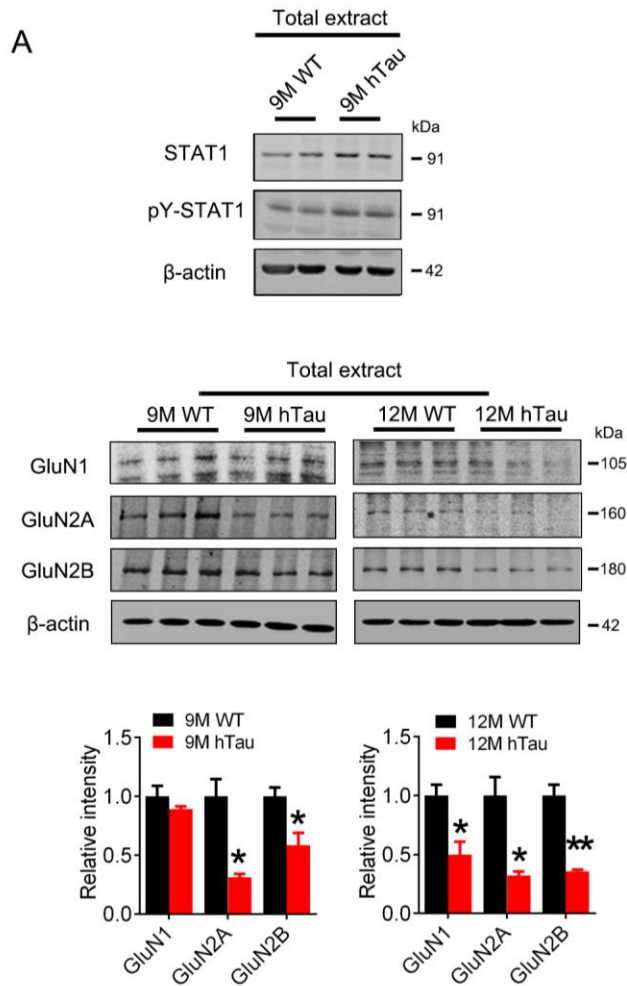

71

72 **Appendix Figure S3 Phosphorylated STAT1 level increases and NMDAR levels**  
 73 **decrease in the 9-month- and 12-month-old hTau mice.**

74 (A) The increased STAT1 and pY-STAT1 in hippocampal total extracts of 9-month-old  
 75 hTau transgenic mice measured by Western blotting.

76 (B) The decreased NMDAR levels in hippocampal total extracts of 9-month- and 12-  
 77 month-old hTau transgenic mice measured by Western blotting and quantitative analysis

78 (n=4, Mann-Whitney test).

79 **Data information:** \*,  $p < 0.05$ ; \*\*,  $p < 0.01$  vs WT. Data were presented as mean  $\pm$  SD.

80

81

82

83

84

85

86

87

88



89 **Appendix Figure S4**

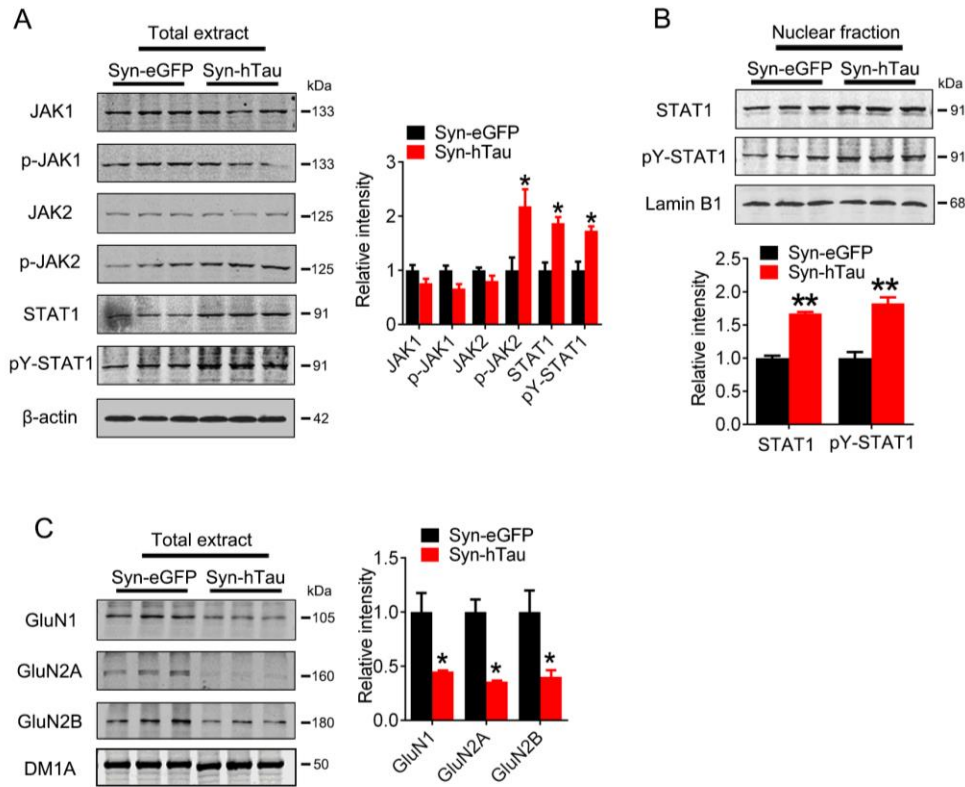

90

91 **Appendix Figure S4 Specifically overexpressing hTau in neurons activated JAK2-**  
 92 **STAT1 axis and decrease NMDAR levels.**

93 (A-C) Syn-hTau-AAV (Syn-hTau) or the empty vector AAV-Syn (Syn-eGFP) ( $1.99 \times 10^{13}$   
 94 v.g./ml) was injected stereotaxically into hippocampal CA3 of 3-month-old C57 mice.  
 95 After one month, the total hippocampal extracts and the nuclear fraction were prepared  
 96 for Western blotting analyses.

97 (A) The increased levels of STAT1, pY-STAT1 and p-JAK2 in hippocampal total  
 98 extracts were detected in hTau group.

99 (B) The increased levels of STAT1 and pY-STAT1 in the nuclear fraction of the  
100 hippocampus were detected in hTau group.

101 (C) The reduced protein levels of GluN1, GluN2A and GluN2B in total hippocampal  
102 extracts in hTau group.

103 **Data information:** \*,  $p < 0.05$ , \*\*,  $p < 0.01$  vs Syn-eGFP. Data were presented as mean  $\pm$

104 SD (n=4, Mann-Whitney test).

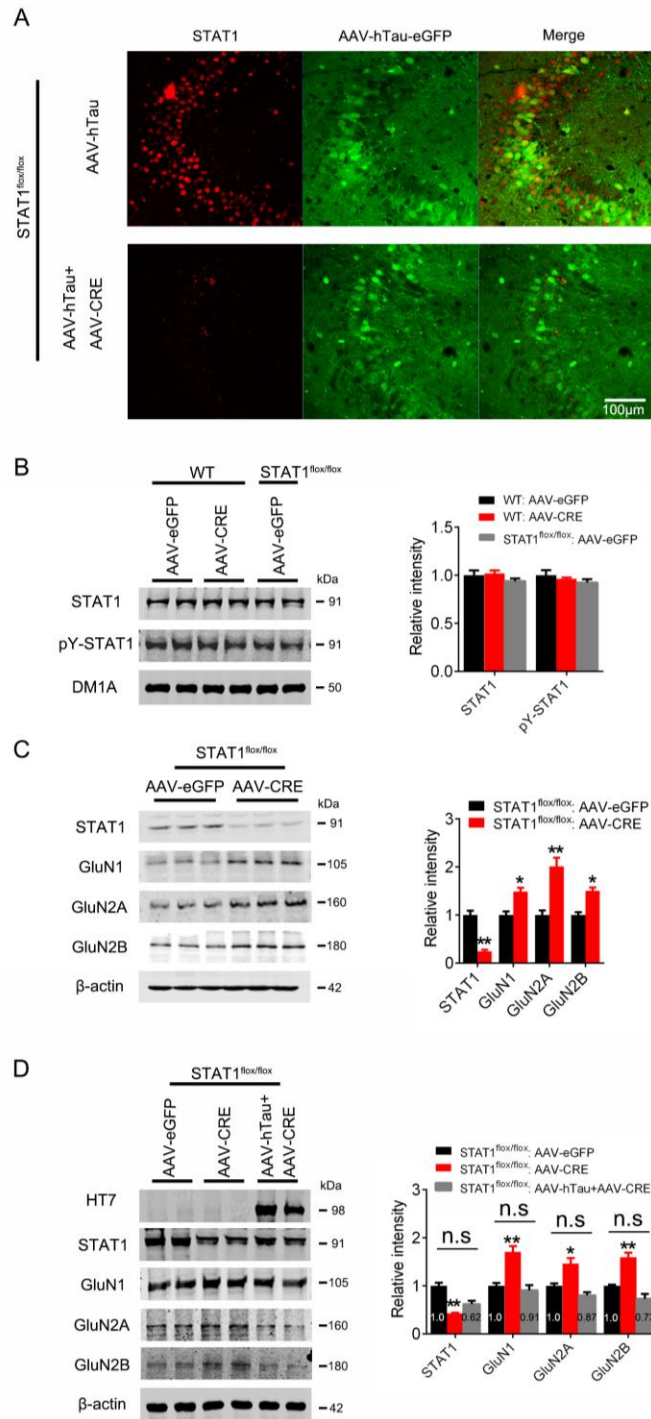

107 **Appendix Figure S5 Knockdown STAT1 negatively regulates the expression of**  
108 **NMDARs.**

109 (A) AAV-Cre ( $5 \times 10^{12}$  v.g./ml) mixed with AAV-hTau were stereotaxically injected into  
110 the hippocampal CA3 of 3-month-old STAT1<sup>flx/flx</sup> mice. One month later,  
111 downregulation of STAT1 was confirmed by immunofluorescence staining.

112 (B) AAV-Cre or AAV-eGFP ( $1.13 \times 10^{13}$  v.g./ml) was stereotaxically injected into the  
113 hippocampal CA3 of 3-month-old C57 WT or STAT1<sup>flx/flx</sup> mice. One month later, the  
114 protein levels of STAT1 and pY-STAT1 were detected by Western blotting.

115 (C) AAV-Cre or AAV-eGFP ( $1.13 \times 10^{13}$  v.g./ml) was stereotaxically injected into the  
116 hippocampal CA3 of 3-month-old STAT1<sup>flx/flx</sup> mice. One month later, the protein levels  
117 of STAT1 and NMDARs were detected by Western blotting.

118 (D) AAV-Cre, AAV-eGFP ( $1.13 \times 10^{13}$  v.g./ml), or AAV-Cre mix with AAV-hTau was  
119 stereotaxically injected into the hippocampal CA3 of 3-month-old STAT1<sup>flx/flx</sup> mice.  
120 One month later, the protein levels of STAT1 and NMDARs were detected by Western  
121 blotting.

122 **Data information:** Data were presented as mean  $\pm$  SD (n=3). (one-way ANOVA,  
123 Bonferroni's post hoc test). \*,  $p < 0.05$ , \*\*,  $p < 0.01$ , \*\*\*,  $p < 0.001$  vs AAV-eGFP group.

124

125

126 **Appendix Figure S6**

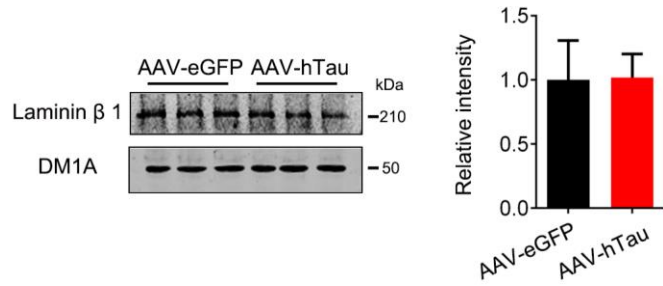

127

128 **Appendix Figure S6 Overexpressing hTau does not affect the protein level of**

129 **laminin β1.**

130 AAV-hTau or the empty vector (eGFP) ( $1.13 \times 10^{13}$  v.g./ml) (1μl) was stereotaxically

131 infused into the hippocampal CA3 of 3-month-old C57 mice. One month later, laminin

132 β1 protein level in the extract of hippocampal CA3 was detected by Western blotting.

133 Data were presented as mean ± SD (n=4, Mann-Whitney test).

134

135

136

137

138

139

140

141

142

143 **Appendix Figure S7**

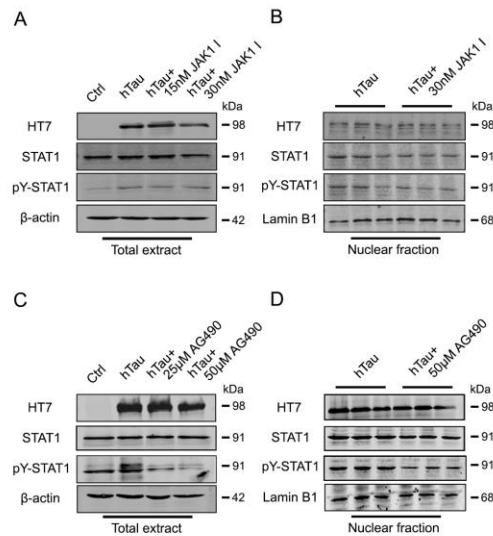

144

145 **Appendix Figure S7 JAK2 non-specific inhibitor AG490 abolishes hTau-induced**  
146 **STAT1 phosphorylation at Tyr701 in total extracts and the nuclear fraction.**

147 (A, B) Overexpression of hTau in HEK293 cells for 48 h, pharmacological inhibition of  
148 JAK1 (A, B) for 24 h did not significantly affect hTau-induced STAT1 phosphorylation  
149 at pY-STAT1 (Tyr701) in total extracts (A) and the nuclear fraction (B) measured by  
150 Western blotting.

151 (C, D) Overexpression of hTau in HEK293 cells for 48 h, AG490 (non-specific inhibitor  
152 of JAK2) abolishes the hTau-induced STAT1 phosphorylation at Tyr701 in total extracts  
153 (C) and the nuclear fraction (D).

154 **Appendix Figure S8**

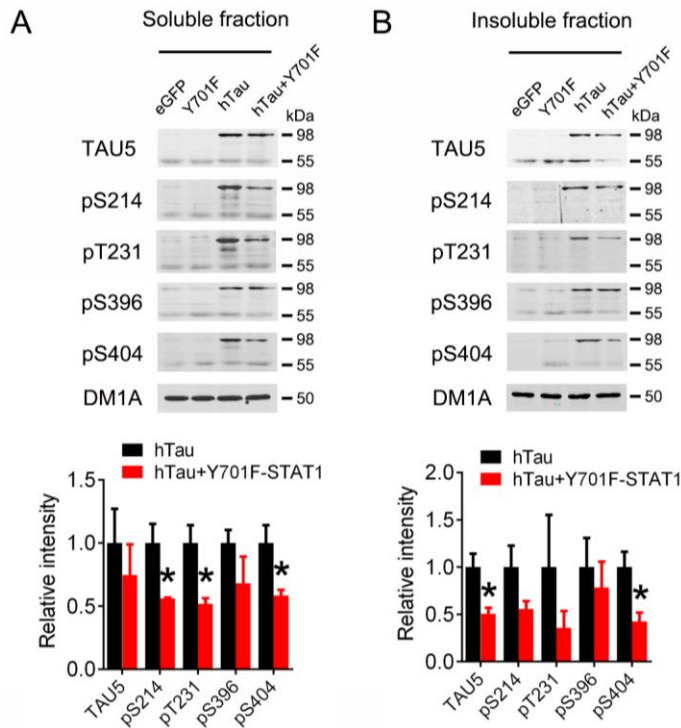

155

156 **Appendix Figure S8 STAT1 inhibition reduces hyperphosphorylation and**  
 157 **aggregation of tau in vivo.**

158 (A, B) AAV-hTau or the empty vector (eGFP) ( $1.13 \times 10^{13}$  v.g./ml) with or without AAV-  
 159 Y701F-STAT1 ( $5 \times 10^{12}$  v.g./ml) was stereotaxically injected into the hippocampal CA3  
 160 of 3-month-old C57 mice. One month later, the hippocampal CA3 tissues were separated  
 161 into soluble and insoluble fraction. Tau protein level and tau hyperphosphorylation at  
 162 pS214, pT231, pS396 and pS404 epitopes was detected by Western blotting.

163 **Data information:** \*,  $p < 0.05$  vs hTau. Data were presented as mean  $\pm$  SD (n=4, Mann-  
 164 **Whitney test).**

165

**Appendix Table S1 The transcription factors detected by TF activation plate array II**

|         |                 |                   |          |             |                |        |             |
|---------|-----------------|-------------------|----------|-------------|----------------|--------|-------------|
| 1       | 2               | 3                 | 4        | 5           | 6              | 7      | 8           |
| AP1     | AP2             | AR                | ATF2     | Brn-3       | C\EBP          | CAR    | CBF         |
| CDP     | CREB            | E2F-1             | EGR      | ER          | Ets            | FAST-1 | GAS/IS<br>R |
| GATA    | GR/PR           | HIF               | HNF4     | IRF         | MEF2           | Myb    | Myc-Ma      |
| NF-1    | NFAT            | NF-E2             | NFkB     | 4-Oct       | p53            | Pax-5  | Pbx1        |
| Pit     | PPAR            | PXR               | SMAD     | Sp1         | SRF            | SATB1  | Stat1       |
| Stat3   | Stat4           | Stat5             | Stat6    | TCF/L<br>EF | YY1            | TR     | TFIID       |
| XBP     | AP3             | AP4               | COUP-TF  | ELK         | FOXA<br>1      | FoxC1  | FOXD3       |
| FOXG1   | FOXO1(<br>FKHR) | FREAC2(<br>FOXF2) | Gli-1    | Gli-1       | HEN(N<br>SL-1) | HNF-1  | HOX4C       |
| HoxA-5  | HSF             | KLF4              | MyoD     | MZF         | Nkx2-5         | Nkx3-2 | NRF1        |
| NRF2(A) | 1-Oct           | Pax2              | Pax3     | Pax8        | PITI           | PLAG1  | MEF1        |
| Prox1   | RB              | RNUX              | ROR(RZR) | RXR         | SF-1           | SMUC   | Snail       |
| SOX2    | SOX9            | SOX18             | SRY      | TFE3        | USF-1          | VDR    | WT1         |



**Appendix Table S2 The description of TF gene detected in TF activation plate array II**

| TF names     | Gene Description                                    |
|--------------|-----------------------------------------------------|
| AP1          | Activator protein 1(JUN/FOS)                        |
| AP2          | Activator protein2                                  |
| AR           | Androgen receptor                                   |
| ATF2         | activating transcription factor 2                   |
| Brn-3        | POU domain,class 4,transcription factor1            |
| C/EBP        | CCAAT/enhancer binding protein(C/EBP),alpha         |
| CAR          | nuclear receptor subfamily 1,groupI,member3         |
| CBF          | CCAAT/enhancer binding protein(C/EBP),zeta          |
| CDP          | cut-like homeobox 1;CCAAT displacement protein      |
| CREB         | cAMP responsive element binding protein1            |
| E2F1         | E2F transcription factor1                           |
| EGR          | Early growth response                               |
| ER           | Estrogen receptor                                   |
| Ets          | v-ets erythroblastosis virus E26 oncogene homolog 1 |
| FAST1(FOXH1) | Forkhead boxH1                                      |
| GAS/ISRE     | IFN-stimulated response element                     |
| GATA         | GATA transcription factor                           |
| GR/PR        | Glucocorticoid receptor/Progesterone receptor       |
| HIF          | Hypoxia inducible factor                            |

|            |                                                   |
|------------|---------------------------------------------------|
| HNF4       | Hepatocyte nuclear factor4                        |
| IRF        | Interferon regulatory factor                      |
| MEF2       | Myocyte enhancer factor 2                         |
| Myb        | v-myb myeloblastosis viral oncogene homolog       |
| Myc-Max    | v-myc myelocytomatosis biral oncogene homolog     |
| NF-1       | Nuclear factor1                                   |
| NFAT       | Nuclear factor of activated T-cells               |
| NF-E2      | Nuclear factor(erythroid derived 2)               |
| NFkb       | nuclear factor of kappa light polypeptide gene    |
| OCT4       | POU class 5 homeobox1                             |
| p53        | Tumor protein p53                                 |
| Pax-5      | Paired box5                                       |
| Pbx1       | Pre-B cell leukemia transcription factor1         |
| Pit        | Pituitary specific transcription factor1          |
| PPAR       | Peroxisome proliferator-activated receptor        |
| PXR        | Pregnane X Receptor                               |
| SMAD(MADH) | SMAD family                                       |
| Sp1        | SP1 transcription factor                          |
| SRF        | Serum response factor                             |
| SATB1      | Special AT-rich sequence binding protein 1        |
| Stat1      | Signal transducer and activator of transcription1 |
| Stat3      | Signal transducer and activator of transcription3 |

|             |                                                   |
|-------------|---------------------------------------------------|
| Stat4       | Signal transducer and activator of transcription4 |
| Stat5       | Signal transducer and activator of transcription5 |
| Stat6       | Signal transducer and activator of transcription6 |
| TCF/LEF     | Runt-related transcription factor 2               |
| YY1         | YY1 transcription factor                          |
| TR          | Thyroid hormone receptor                          |
| TFIID       | TATA box binding protein                          |
| TF names    | Gene Description                                  |
| XBP-1       | X-Box binding protein 1                           |
| AP3         | AP3 protein                                       |
| AP4         | AP4 protein                                       |
| COUP-TF     | nuclear receptor subfamily 2,group F,             |
| ELK         | ETS domain-containing protein Elk-1               |
| FOXA1       | homeoboxA1                                        |
| FoxC1       | homeoboxC1                                        |
| FOXD3       | forkhead box D3                                   |
| FOXG1       | FOXbox G1                                         |
| FOXO1(FKHR) | FOXbox O1                                         |
| FREAC-2     | Forkhead-related activator 2                      |
| Gfi-1       | growth factor independent 1 transcription         |
| Gli-1       | GLI zinc finger transcription factor              |
| HEN(NSCL1)  | helix-lool-helix protein                          |

|           |                                           |
|-----------|-------------------------------------------|
| HNF-1     | Hepatocyte Nuclear Factor1                |
| HOX4C     | HOX4C homobox                             |
| HOXA-5    | homobox A5                                |
| HSF       | Heat shock transcription factor 1         |
| KLF4      | Kruppel-like factor4                      |
| MyoD      | muogenic differentiation i protein        |
| MZF       | zinc finger type transcription factor MZF |
| Nkx2-5    | Homeobox protein Nkx-2.5                  |
| Nkx3-2    | Homeobox protein Nkx-3.2                  |
| NRF1      | nuclear respiratory factor                |
| NRF2(ARE) | NRF2-related antioxidant responsive       |
| Oct-1     | POU domain,class 2,transcription factor   |
| Pax2      | Pair box-2 protein                        |
| Pax3      | Pair box-3 protein                        |
| Pax8      | Pair box-8 protein                        |
| PIT1      | POU class 1 homeobox1                     |
| PLAG1     | pleiomorphic adenoma gene 1               |
| MEF1      | Myocyte enhancer factor 1                 |
| Prox1     | Prospero homeobox protein1                |
| RB        | Retinoblastoma control element            |
| RNUX      | SL3-3 enhancer factor1                    |
| ROR(RZR)  | retinoic acid receptor related orphan     |

|        |                                         |
|--------|-----------------------------------------|
| RXR    | retinoid Xreceptor                      |
| SF1    | Steroidogenic factor1                   |
| SMUC   | snail-related transcription factor Smuc |
| Snail  | Snail 1 zinc finger protein             |
| SOX2   | SOX protein 18                          |
| SOX9   | SOX protein 2                           |
| SOX-18 | SOX protein 9                           |
| SRY    | sex determining region Y                |
| TFE3   | transcription factor binding to IGHM    |
| USF-1  | upstream transcription factor 1         |
| VDR    | vitamin D(1,25dihydroxy vitamin D3)     |

167

**Appendix Table S3 The antibodies used in the study**

| Antibody | Specific          | Type      | WB         | IHC       | Source                         |
|----------|-------------------|-----------|------------|-----------|--------------------------------|
| STAT1    | Total STAT1       | Poly-     | 1:500      | 1:10<br>0 | abcam                          |
| pY-STAT1 | p-STAT1 at Tyr701 | Mon<br>o- | 1:500      | 1:20<br>0 | abcam                          |
| pY-STAT1 | p-STAT1 at Tyr701 | Poly-     | 1:300      |           | Thermo<br>Fisher<br>Scientific |
| pS-STAT1 | p-STAT1 at Ser727 | Poly-     | 1:300      |           | Thermo<br>Fisher<br>Scientific |
| GluN2A   | GluN2A C-term     | Poly-     | 1:100<br>0 | 1:20<br>0 | abcam                          |
| GluN2B   | GluN2B C-term     | Poly-     | 1:100<br>0 | 1:20<br>0 | abcam                          |
| GluN1    | GluN1 C-term      | Poly-     | 1:100<br>0 | 1:20<br>0 | Merck<br>Millipore             |
| GluA1    | Total GluA1       | Poly-     | 1:100<br>0 |           | abcam                          |
| GluA2    | Total GluA2       | Mon<br>o- | 1:100<br>0 |           | Merck<br>Millipore             |

|                |                         |           |            |           |                                |
|----------------|-------------------------|-----------|------------|-----------|--------------------------------|
| SYN1           | Total Synaptophysin     | Poly-     | 1:100<br>0 |           | abcam                          |
| SYT1           | Total Synaptotagmin     | Mon<br>o- | 1:100<br>0 |           | abcam                          |
| $\beta$ -actin | Toal $\beta$ -actin     | Mon<br>o- | 1:100<br>0 |           | abcam                          |
| DM1A           | Toal $\alpha$ -tubulin  | Mon<br>o- | 1:100<br>0 |           | abcam                          |
| Lamin B1       | Total Lamin B1          | Poly-     | 1:100<br>0 |           | abcam                          |
| GFP            | GFP-tag                 | Mon<br>o- | 1:100<br>0 |           | abcam                          |
| FLAG           | FLAG-tag                | Mon<br>o- | 1:100<br>0 |           | Merck<br>Millipore             |
| TAU5           | Total tau               | Mon<br>o- | 1:100<br>0 |           | Merck<br>Millipore             |
| HT7            | Total human tau         | Mon<br>o- | 1:100<br>0 |           | Thermo<br>Fisher<br>Scientific |
| AT8            | PHF-tau (Ser202/Thr205) | Mon<br>o- | 1:100<br>0 | 1:20<br>0 | Thermo<br>Fisher<br>Scientific |

|                     |                           |           |            |           |                                 |
|---------------------|---------------------------|-----------|------------|-----------|---------------------------------|
| TDP-43              | Total TDP-43              | Poly-     | 1:100<br>0 |           | proteintech                     |
| $\alpha$ -synuclein | Total $\alpha$ -synuclein | Poly-     | 1:100<br>0 |           | proteintech                     |
| IBA1                | Total IBA1                | Poly-     |            | 1:20<br>0 | Wako                            |
| GFAP                | Total GFAP                | Mon<br>o- |            | 1:20<br>0 | Cell<br>Signaling<br>Technology |
| CBF                 | Total C/EBP $\zeta$       | Goat-     | 1:300      |           | Santa Cruz<br>Biotechnolog<br>y |
| PIT1                | Total PIT1                | Poly-     | 1:300      |           | Santa Cruz<br>Biotechnolog<br>y |
| SF1                 | Total SF1                 | Poly-     | 1:300      |           | Santa Cruz<br>Biotechnolog<br>y |
| PLAG1               | Total PLAG1               | Poly-     | 1:100<br>0 |           | abcam                           |
| HNF1                | Total HNF1                | Poly-     | 1:300      |           | Santa Cruz<br>Biotechnolog<br>y |



|        |                             |       |            |  |                                 |
|--------|-----------------------------|-------|------------|--|---------------------------------|
| HOXD9  | total HOXD9                 | Poly- | 1:300      |  | Santa Cruz<br>Biotechnology     |
| VDR    | Total Vitamin D<br>Receptor | Poly- | 1:500      |  | abcam                           |
| SMUC   | Total SMUC                  | Poly- | 1:200      |  | Santa Cruz<br>Biotechnology     |
| JAK1   | Total JAK1                  | Poly- | 1:100<br>0 |  | Cell<br>Signaling<br>Technology |
| p-JAK1 | p-JAK1 at Tyr1022/1023      | Poly- | 1:300      |  | abcam                           |
| JAK2   | Total JAK2                  | Poly- | 1:100<br>0 |  | Cell<br>Signaling<br>Technology |
| p-JAK2 | p-JAK2 at Tyr1007/1008      | Poly- | 1:500      |  | Cell<br>Signaling<br>Technology |
| JNK    | Total JNK                   | Poly- | 1:300      |  | Santa Cruz<br>Biotechnology     |
| p-JNK  | p-JNK at Tyr185             | Poly- | 1:500      |  | Cell<br>Signaling               |

|        |                        |       |            |  |                                 |
|--------|------------------------|-------|------------|--|---------------------------------|
|        |                        |       |            |  | Technology                      |
| ERK    | Total ERK              | Poly- | 1:100<br>0 |  | Cell<br>Signaling<br>Technology |
| p-ERK  | p-ERK at Thr202/Tyr204 | Poly- | 1:500      |  | Cell<br>Signaling<br>Technology |
| AKT    | Total AKT              | Poly- | 1:100<br>0 |  | Cell<br>Signaling<br>Technology |
| p-AKT  | p-AKT at Ser473        | Poly- | 1:500      |  | Cell<br>Signaling<br>Technology |
| SGK1   | Total SGK1             | Poly- | 1:100<br>0 |  | abcam                           |
| p-SGK1 | p-SGK1 at Ser78        | Poly- | 1:100<br>0 |  | Cell<br>Signaling<br>Technology |
| P38    | Total P38              | Poly- | 1:100<br>0 |  | Cell<br>Signaling<br>Technology |
| p-P38  | p-P38 at Thr180/Tyr182 | Poly- | 1:500      |  | Cell<br>Signaling               |

|                   |                         |       |       |  |                                 |
|-------------------|-------------------------|-------|-------|--|---------------------------------|
|                   |                         |       |       |  | Technology                      |
| Laminin $\beta$ 1 | Total Laminin $\beta$ 1 | Poly- | 1:100 |  | Santa Cruz<br>Biotechnolog<br>y |

168

169

170

171

172

173

174

175

176

177

178

179

180

181

182

183

184

185

186

187 **Appendix Table S4 Human brain tissues used in the study**

| Case Number | Frozen Tissues Provided | Paraffin Sections Provided | Primary Neuropathologic Diagnosis | Secondary Neuropathologic Diagnosis | Age At Death | ApoE   | Race/ Sex |
|-------------|-------------------------|----------------------------|-----------------------------------|-------------------------------------|--------------|--------|-----------|
| E07-34      | ✓                       |                            | AD-Braak VI                       | Microinfarct-Hp                     | 72           | E3/4   | w/m       |
| E11-97      | ✓                       |                            | AD-Braak VI                       |                                     | 74           | E3/3   | w/m       |
| E12-06      | ✓                       |                            | AD-Braak VI                       |                                     | 68           | E3/3   | w/m       |
| E16-66      |                         | ✓                          | AD-Braak VI                       |                                     | 69           | unknow | w/m       |
| E05-67      |                         | ✓                          | AD-Braak VI                       |                                     | 62           | E3/4   | w/m       |
| E05-194     |                         | ✓                          | AD-Braak VI                       | Infarct                             | 71           | E3/4   | w/m       |
| E06-18      |                         | ✓                          | AD-Braak VI                       | TDP-43 Inclusions                   | 81           | E3/4   | -/f       |
| E06-61      |                         | ✓                          | AD-Braak VI                       |                                     | 86           | E3/4   | w/m       |
| E08-112     |                         | ✓                          | AD-Braak V-VI                     |                                     | 77           | E4/4   | w/m       |
| A87-50      | ✓                       |                            | Control                           |                                     | 66           | E3/3   | w/m       |
| E04-34      | ✓                       |                            | Control                           | Infarct                             | 69           | E3/3   | b/f       |
| E16-45      | ✓                       |                            | Control                           | Braak I                             | 70           | unknow | b/m       |
| E06-137     |                         | ✓                          | Control                           | Infarct                             | 92           | E3/3   | w/f       |
| E09-170     |                         | ✓                          | Control                           | Infarct                             | 88           | E2/3   | w/f       |
| E10-142     |                         | ✓                          | Control                           | Microinfarct-Hp                     | 94           | E3/3   | w/m       |
| E13-27      |                         | ✓                          | Control                           | NFT-Braak III                       | 91           | E3/3   | w/f       |
| E14-06      |                         | ✓                          | Control                           |                                     | 56           | unknow | w/m       |

188
