# Supplementary material
Source: PubMed Central journal article supplement (PMC6549025)

Fig1

C

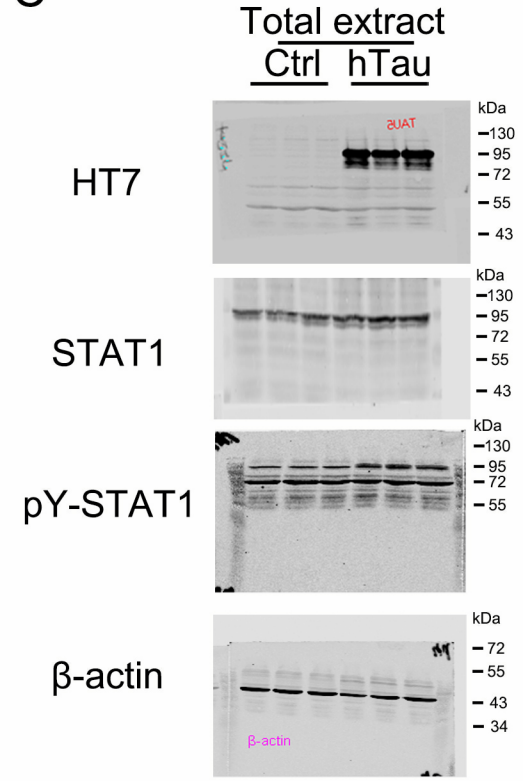

D

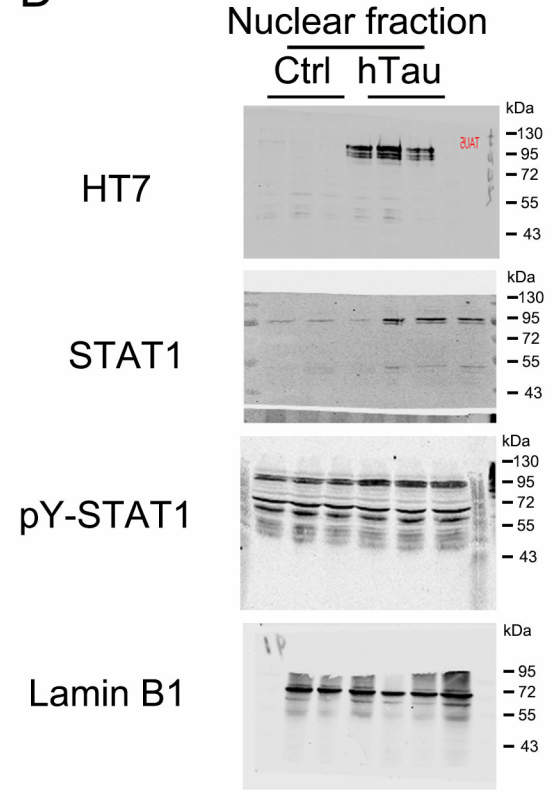

H

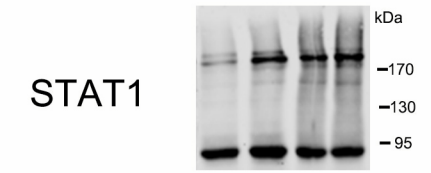

Supplement: EMBR-20-e47202-s003.pdf [file EMBR-20-e47202-s003.pdf]

Fig2

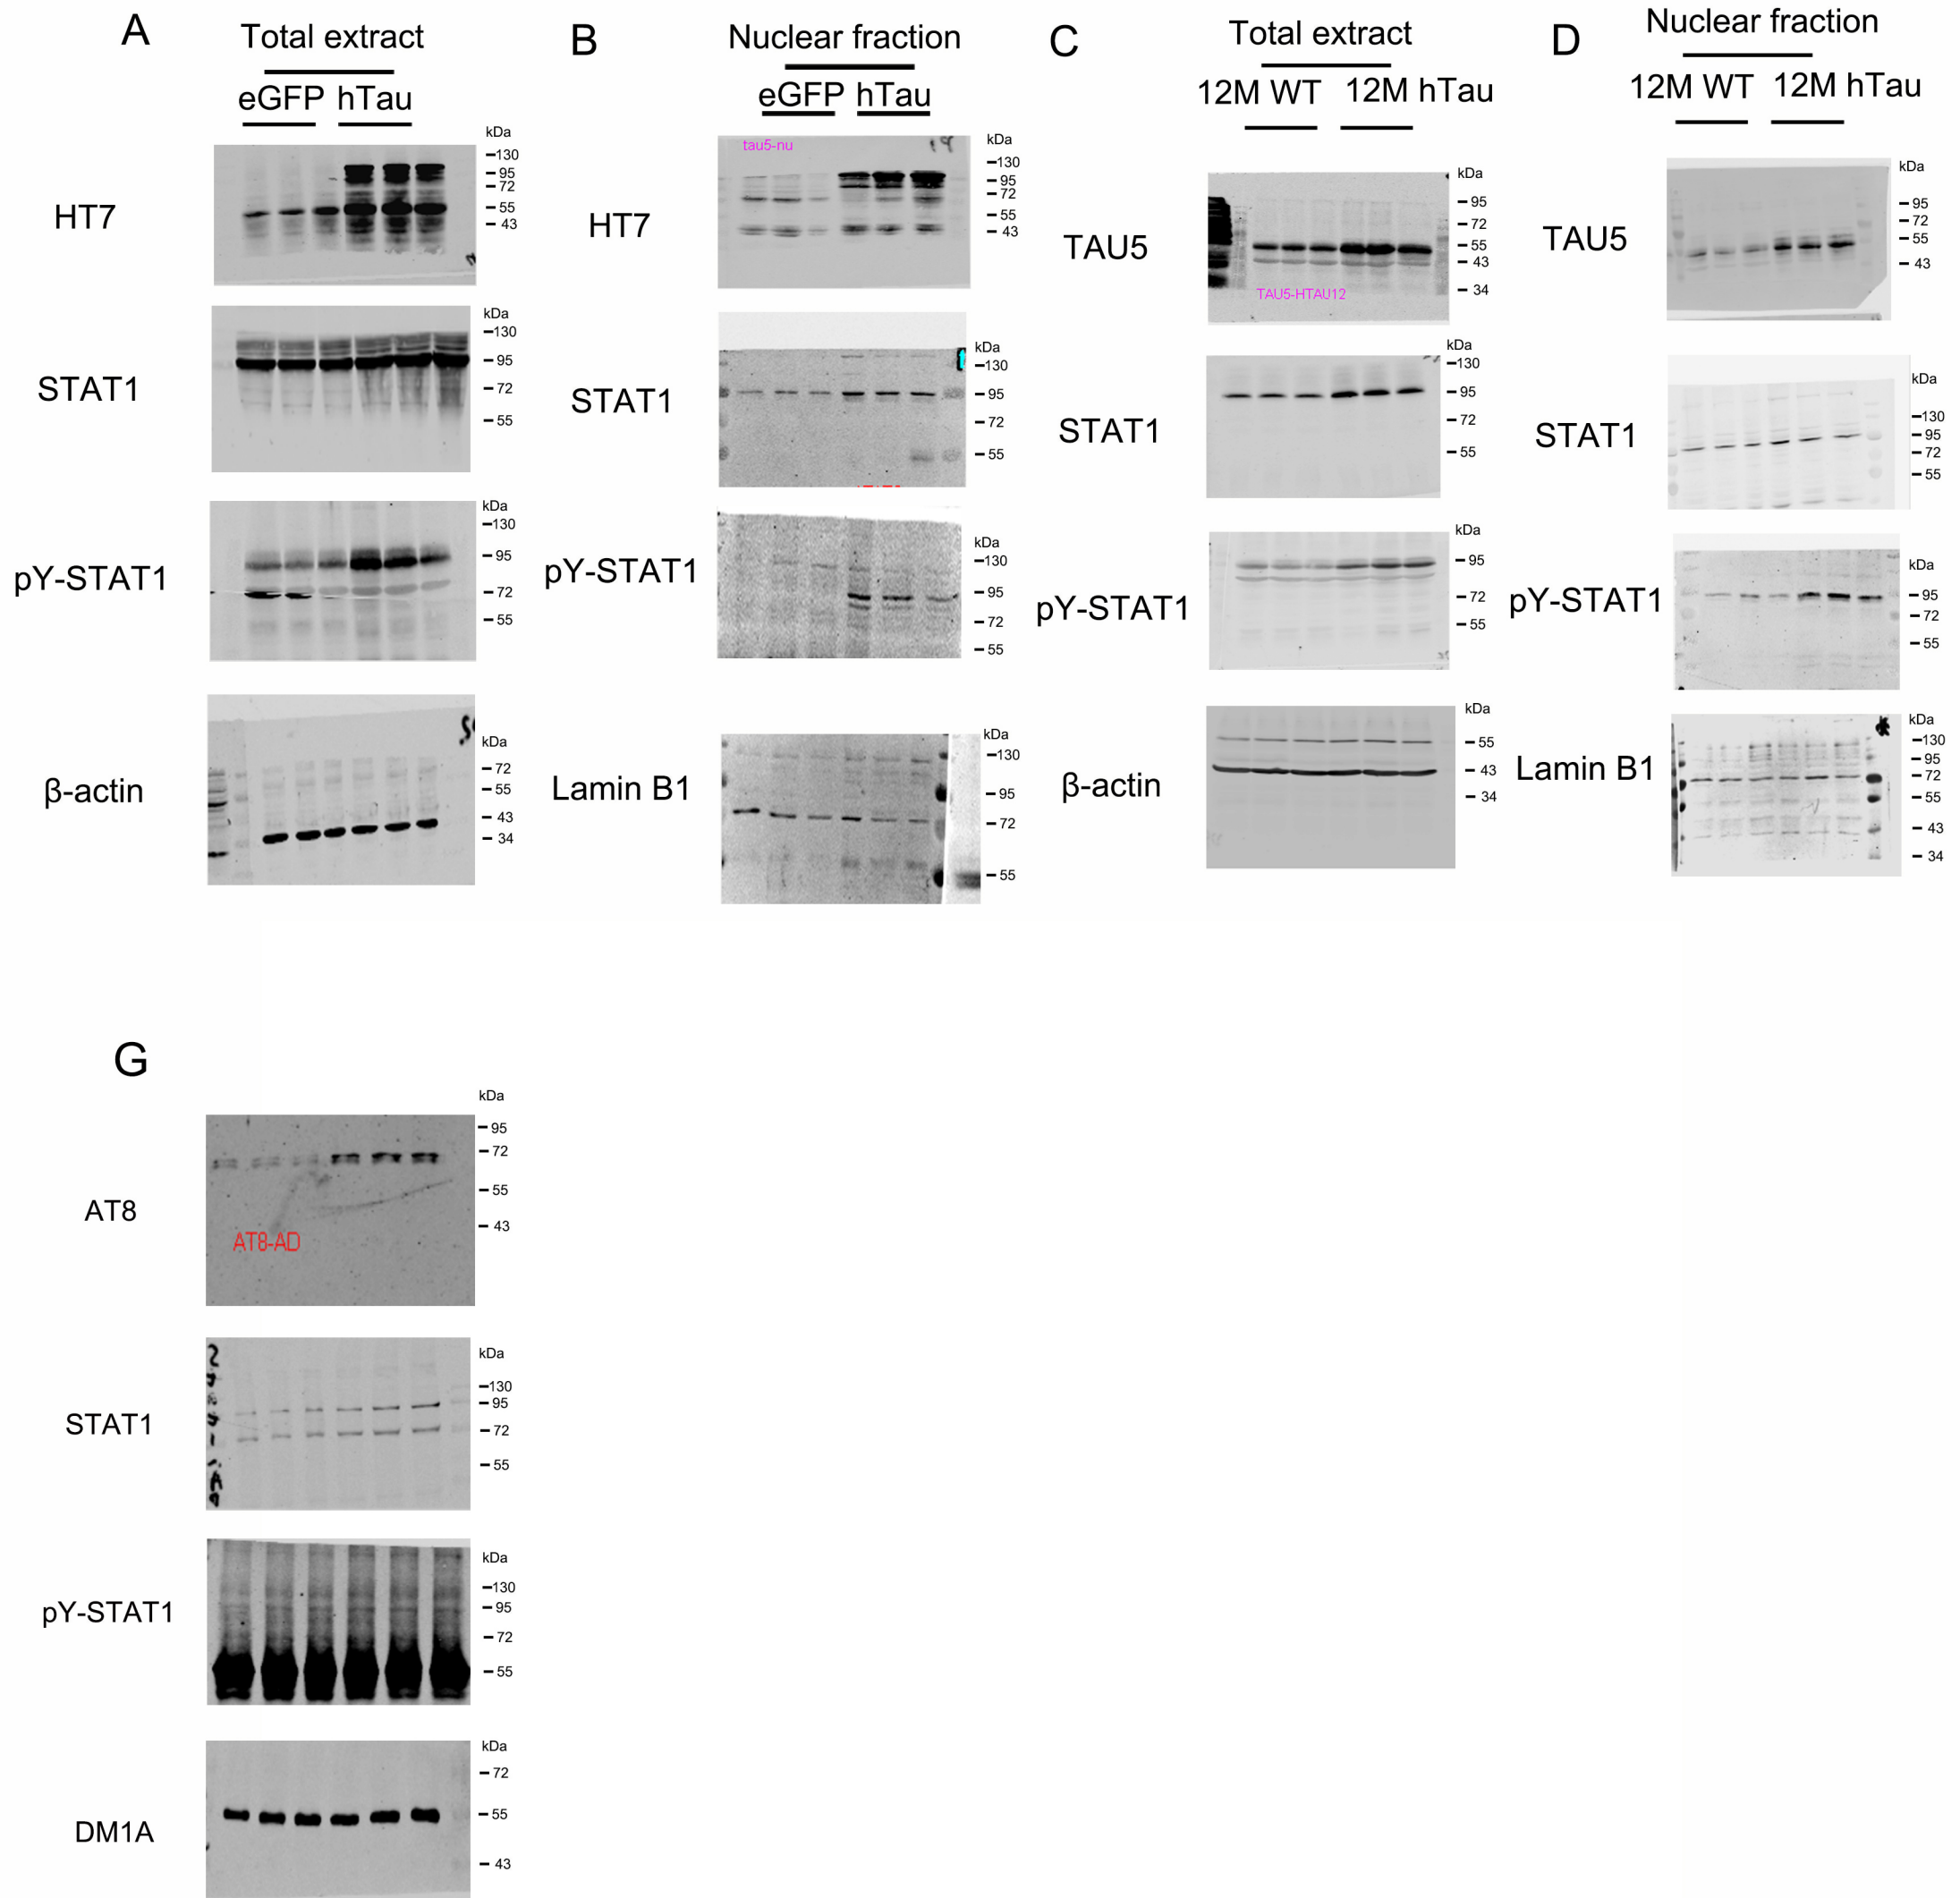

Supplement: EMBR-20-e47202-s004.pdf [file EMBR-20-e47202-s004.pdf]

Fig3.B

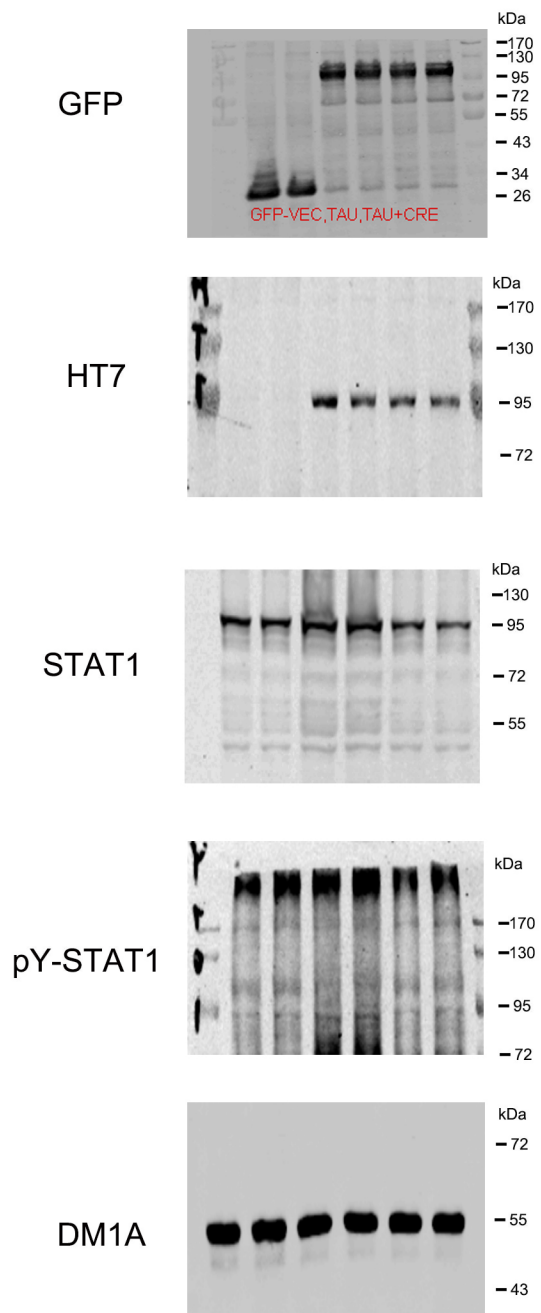

Supplement: EMBR-20-e47202-s005.pdf [file EMBR-20-e47202-s005.pdf]

Fig4

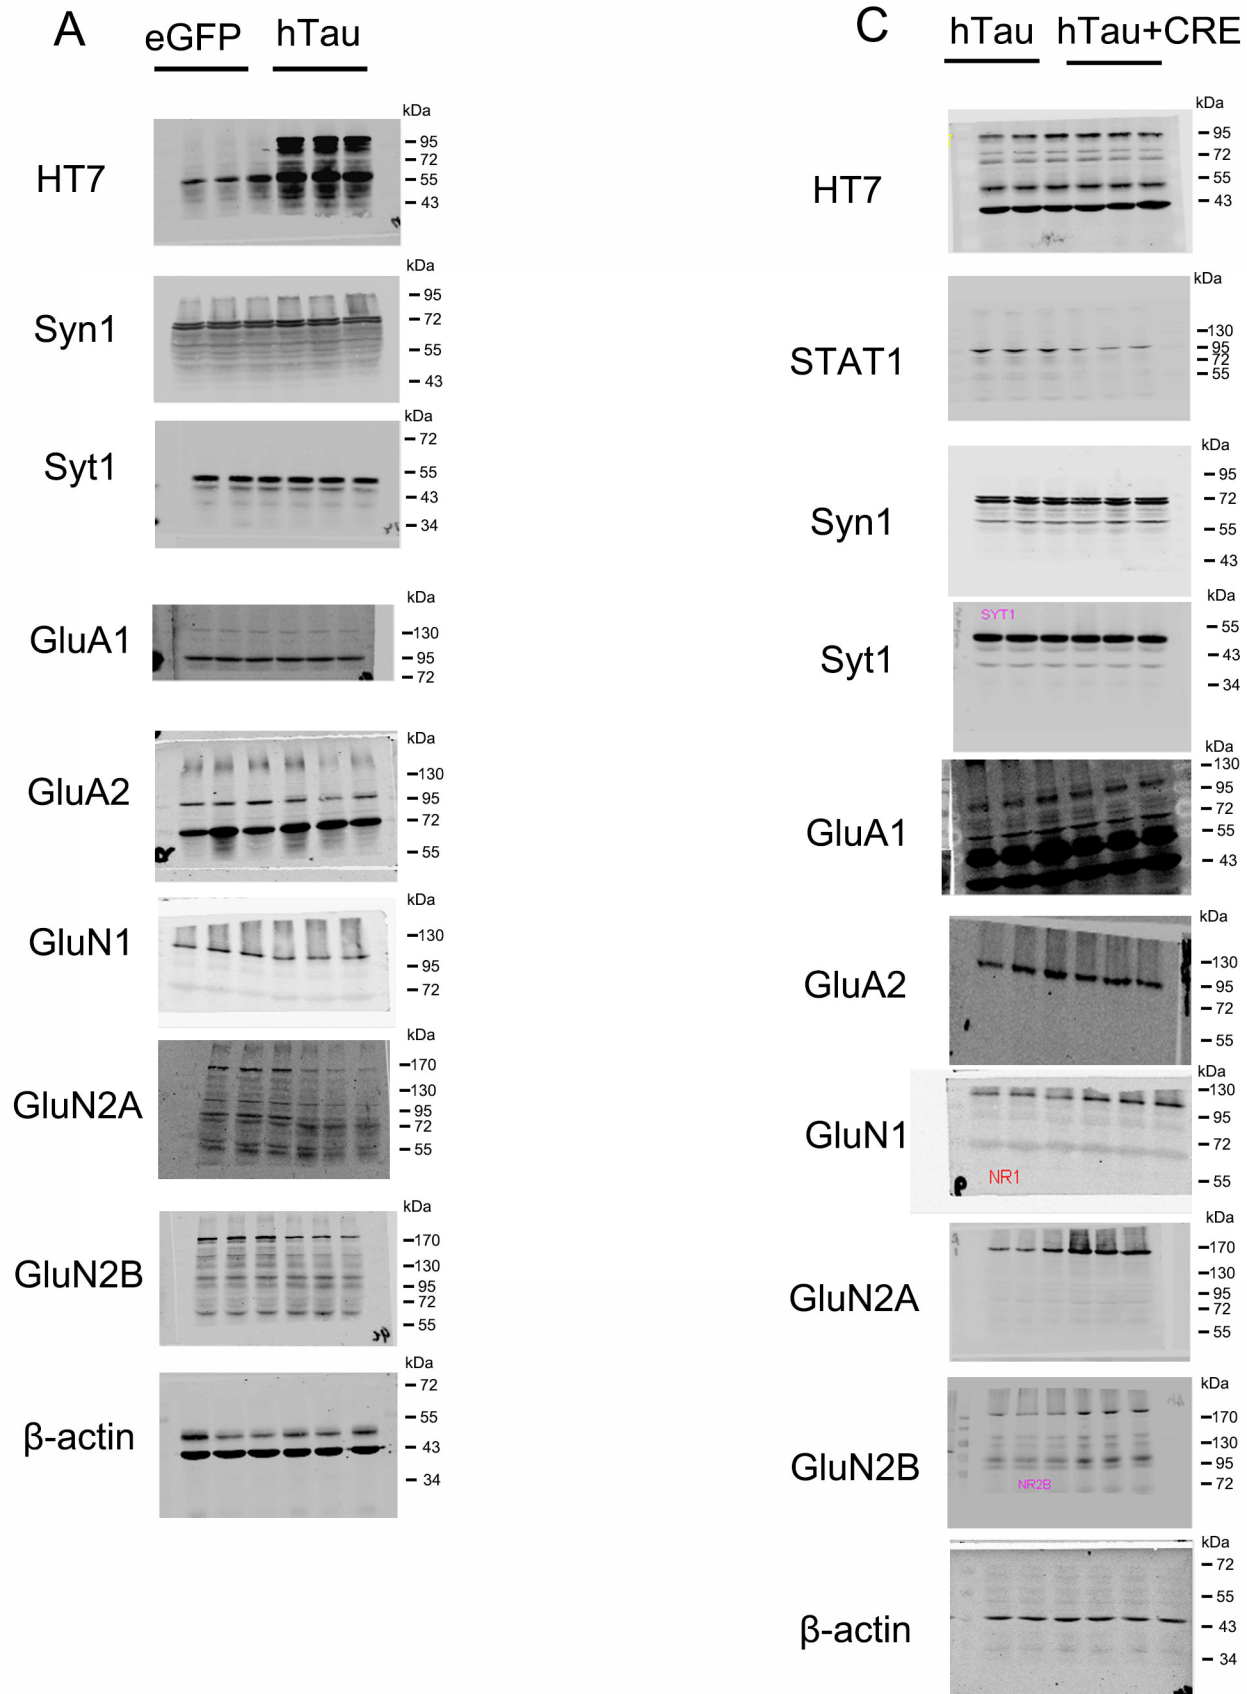

Supplement: EMBR-20-e47202-s006.pdf [file EMBR-20-e47202-s006.pdf]

Fig6

A

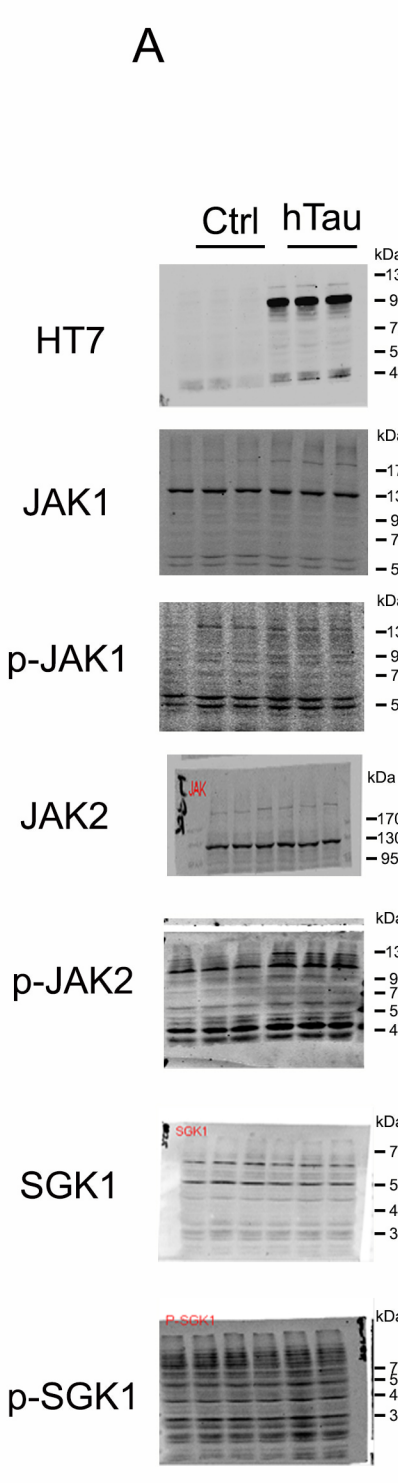

Ctrl hTau

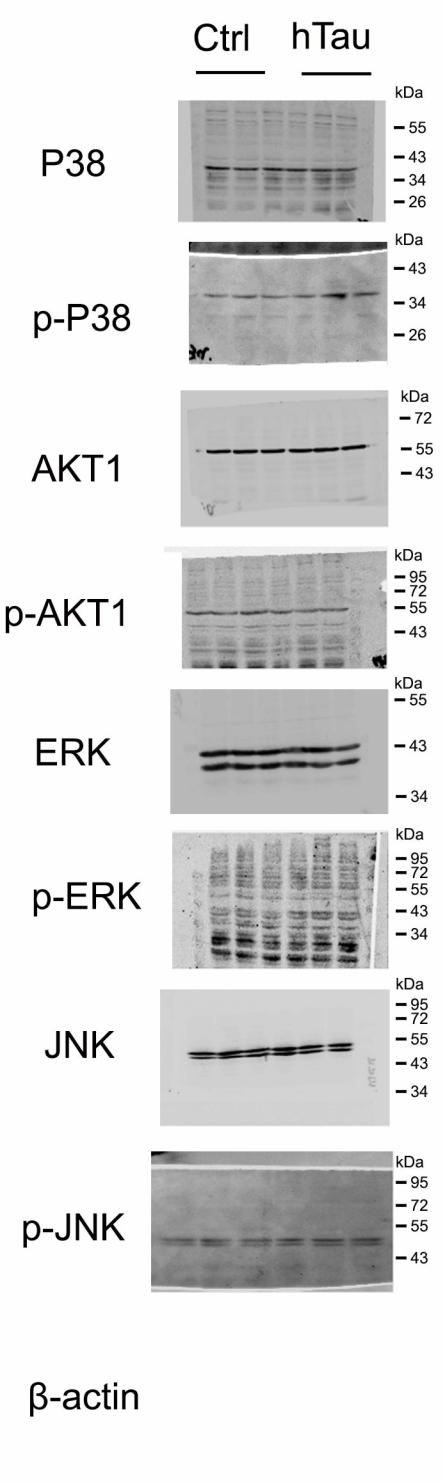

C

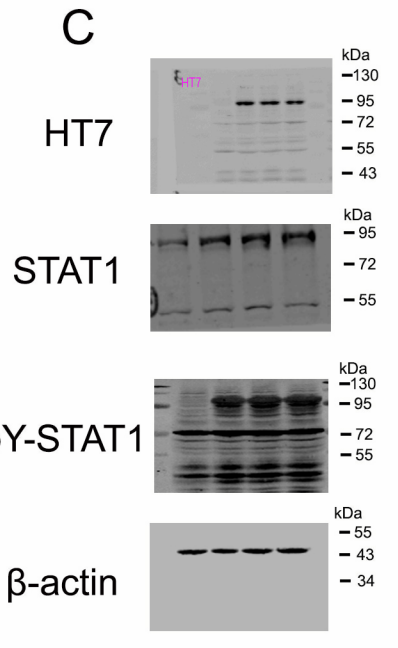

D

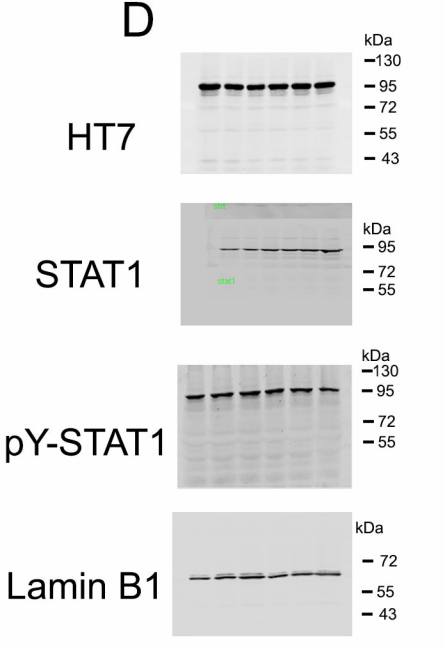

E

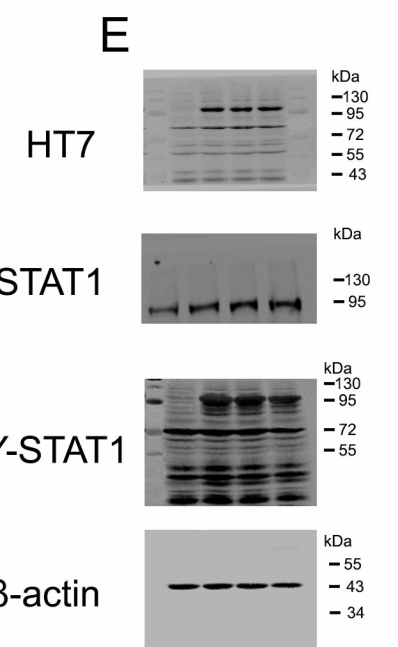

F

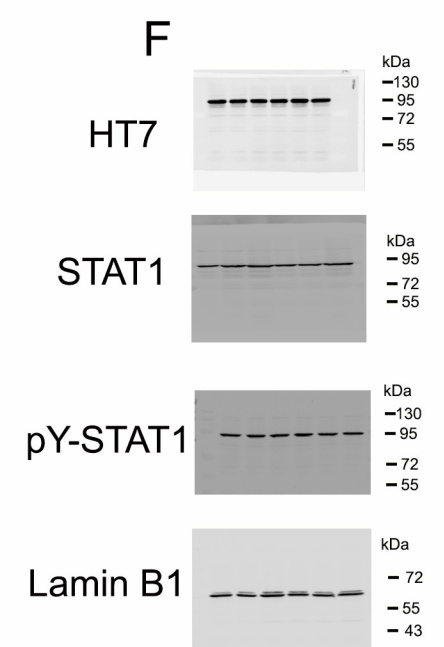

G

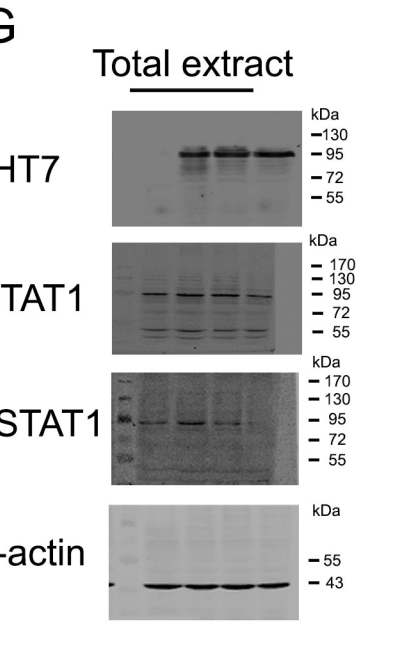

H

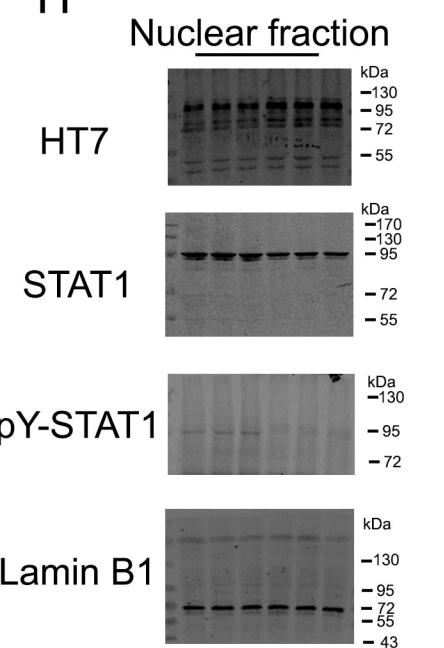

I

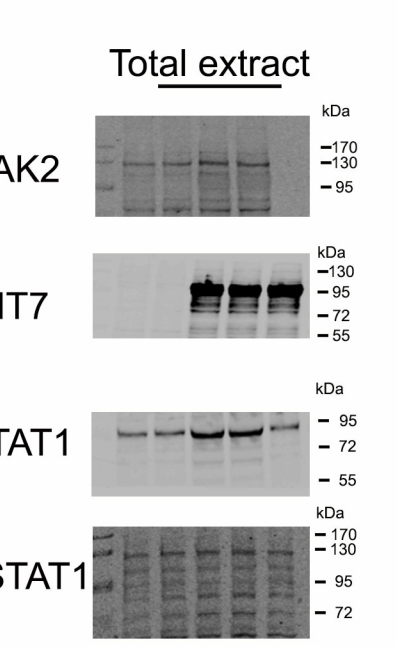

J

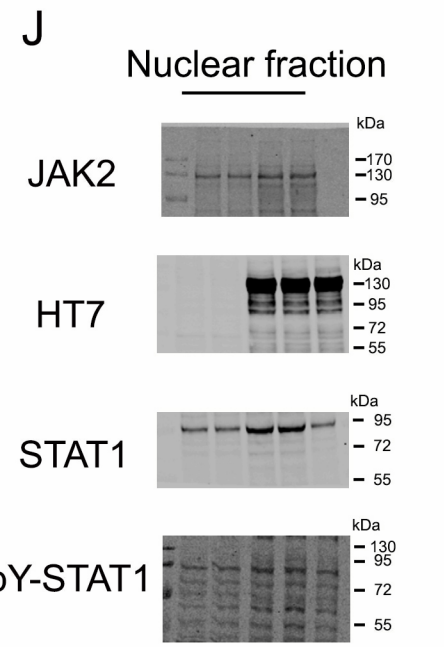

K

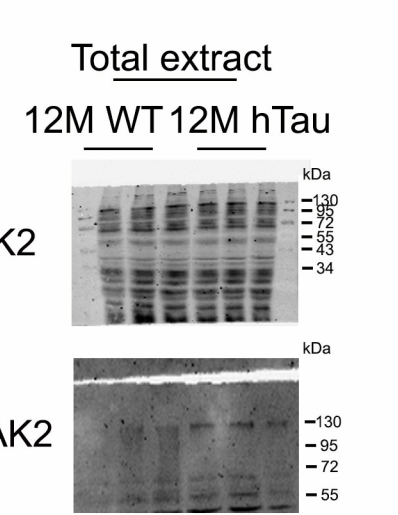

L

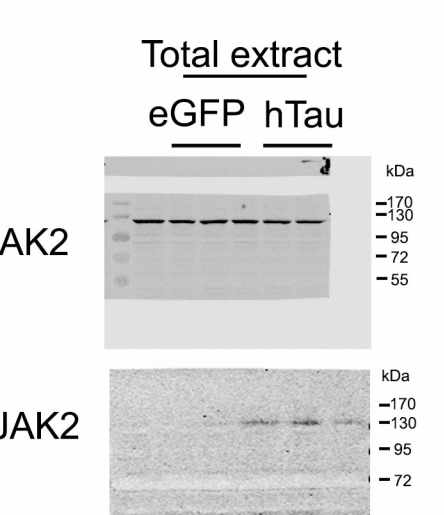

Supplement: EMBR-20-e47202-s007.pdf [file EMBR-20-e47202-s007.pdf]

Fig7

I

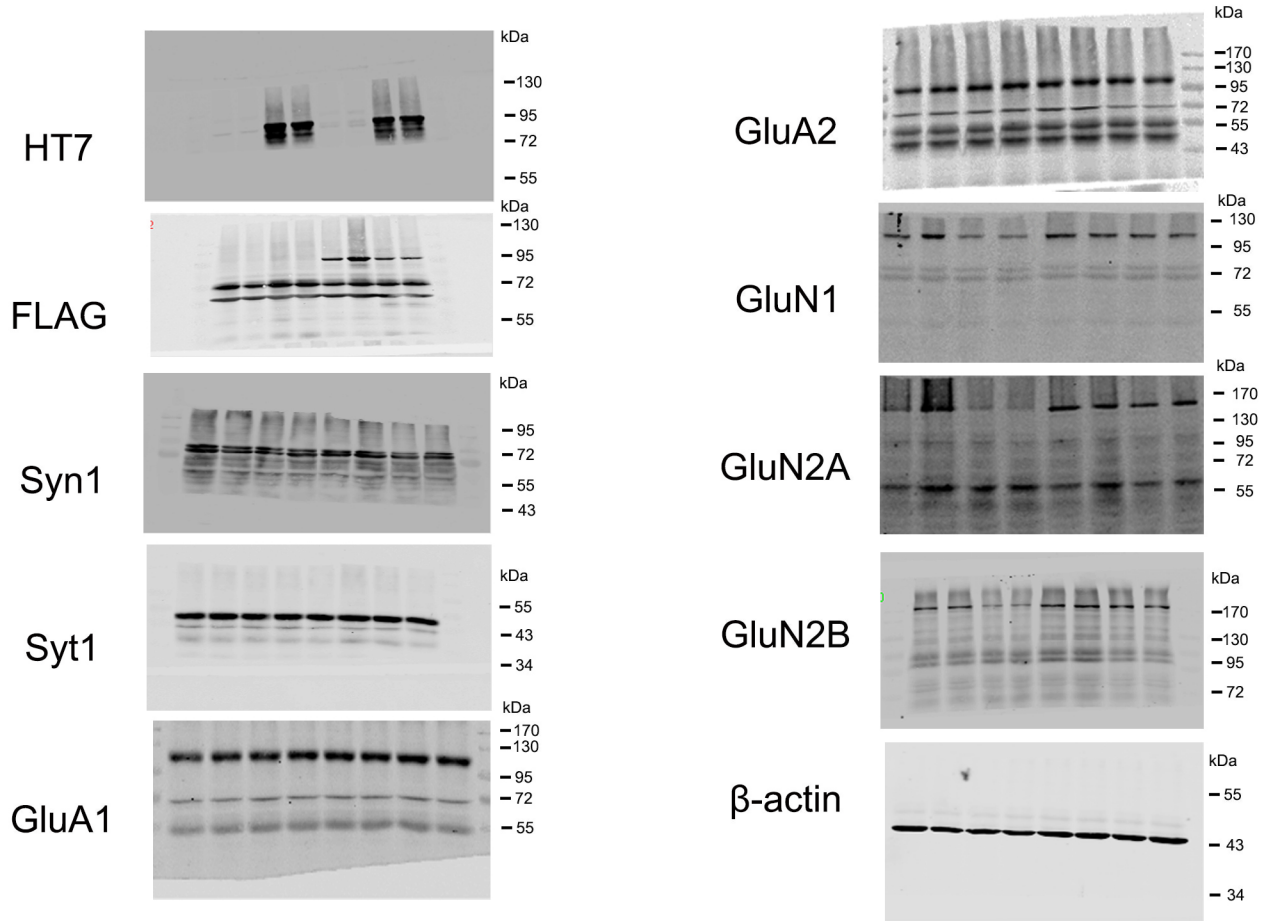

Supplement: EMBR-20-e47202-s008.pdf [file EMBR-20-e47202-s008.pdf]
